# Supplementary material
Source: publisher figshare collection journal article supplement (https://tandf.figshare.com/ndownloader/files/21826689)
Supplement: Supplementary file 1 [file 21826689]

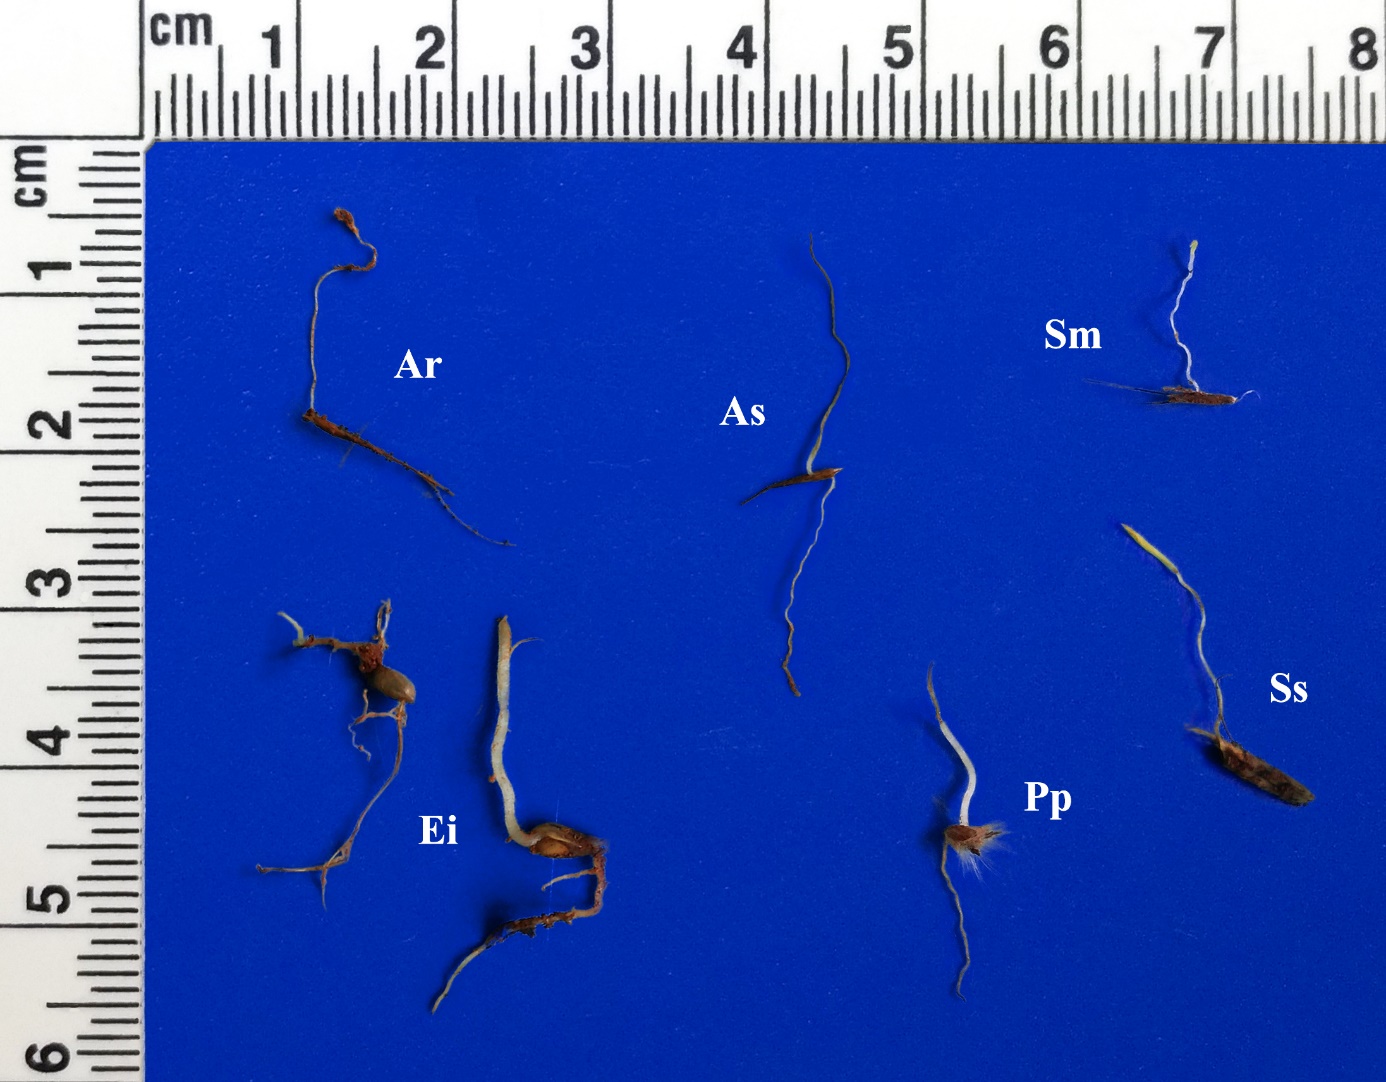


Figure S1. Non-emerged seedlings of six common and widely distributed Cerrado grasses sown at different depths (mm). Ar, *Aristida* *recurvata*; As, *Aristida* *setifolia*; Ei, *Echinolaena* *inflexa*; Pp, *Paspalum* *polyphyllum*; Sm, *Schizachyrium* *microstachyum*; Ss, *Schizachyrium* *sanguineum*.
